# Supplementary material for: Urinary Polycyclic Aromatic Hydrocarbon Metabolites Are Associated with Biomarkers of Chronic Endocrine Stress, Oxidative Stress, and Inflammation in Adolescents: FLEHS-4 (2016–2020)
Source: MDPI journal article supplement (doi:10.3390/toxics9100245), 2021-10-01
Supplement: s1 [file s1]

# Supplementary Materials: Urinary Polycyclic Aromatic Hydrocarbon Metabolites Are Associated with Biomarkers of Chronic Endocrine Stress, Oxidative Stress, and Inflammation in Adolescents: FLEHS-4 (2016–2020)

Veerle J Verheyen, Sylvie Remy, Eva Govarts, Ann Colles, Laura Rodriguez Martin, Gudrun Koppen, Stefan Voorspoels, Liesbeth Bruckers, Esmée M Bijmens, Stijn Vos, Bert Morrens, Dries Coertjens, Annelies De Decker, Carmen Franken, Elly Den Hond, Vera Nelen, Adrian Covaci, Ilse Loots, Stefaan De Henauw, Nicolas Van Larebeke, Caroline Teughels, Tim S Nawrot and Greet Schoeters

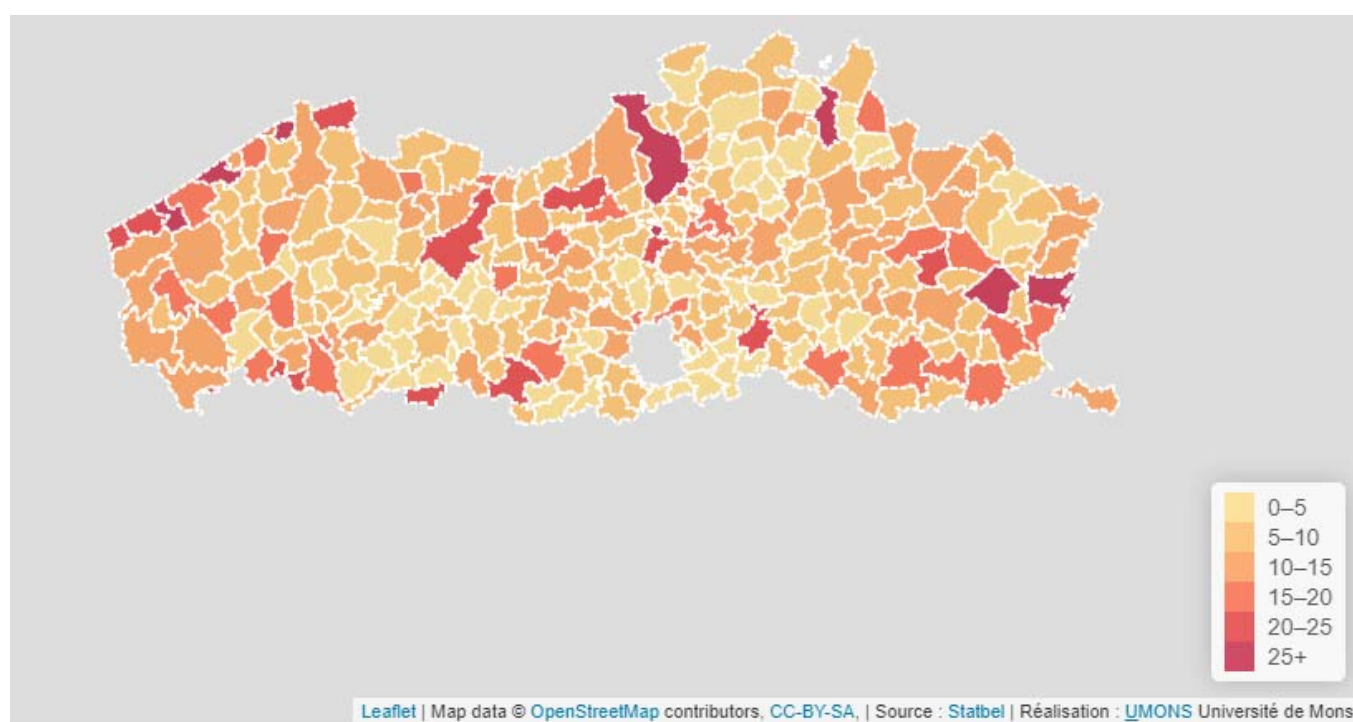

**Figure S1.** Area Deprivation Index in Flanders at municipal level (2017), according to Lahaye, W., Pannecoucke, I., & Sansen, F. (2019). Kinderarmoede en het lokale niveau—De gemeenten in kaart | Koning Boudewijnstichting. [https://www.kbs-frb.be/nl/kinderarmoede\\_inkaart](https://www.kbs-frb.be/nl/kinderarmoede_inkaart).

**Table S1.** Pearson's correlations between PAH exposure biomarkers and effect biomarkers in Flemish adolescents ( $n = 393$ , except noted differently).

|             |               | 1-OHPy      | 2-OHNa      | 2,3-OHFl    | 2-OHPH      | 3-OHPH      | 1,9-OHPH    | ΣOH-PAHs | HCC         | Leukocytes  | Neutrophils | Lymphocytes  | Monocytes   | NLR      | 8-oxodG  |
|-------------|---------------|-------------|-------------|-------------|-------------|-------------|-------------|----------|-------------|-------------|-------------|--------------|-------------|----------|----------|
| 1-OHPy      | Pearson's $r$ | <b>1</b>    |             |             |             |             |             |          |             |             |             |              |             |          |          |
|             | $n$           | 391         |             |             |             |             |             |          |             |             |             |              |             |          |          |
| 2-OHNa      | Pearson's $r$ | <b>0.23</b> | <b>1</b>    |             |             |             |             |          |             |             |             |              |             |          |          |
|             | $n$           | 391         | 392         |             |             |             |             |          |             |             |             |              |             |          |          |
| 2,3-OHFl    | Pearson's $r$ | <b>0.62</b> | <b>0.27</b> | <b>1</b>    |             |             |             |          |             |             |             |              |             |          |          |
|             | $n$           | 391         | 392         | 392         |             |             |             |          |             |             |             |              |             |          |          |
| 2-OHPH      | Pearson's $r$ | <b>0.61</b> | <b>0.19</b> | <b>0.64</b> | <b>1</b>    |             |             |          |             |             |             |              |             |          |          |
|             | $n$           | 391         | 392         | 392         | 393         |             |             |          |             |             |             |              |             |          |          |
| 3-OHPH      | Pearson's $r$ | <b>0.70</b> | <b>0.18</b> | <b>0.69</b> | <b>0.81</b> | <b>1</b>    |             |          |             |             |             |              |             |          |          |
|             | $n$           | 391         | 392         | 392         | 393         | 393         |             |          |             |             |             |              |             |          |          |
| 1,9-OHPH    | Pearson's $r$ | <b>0.61</b> | <b>0.18</b> | <b>0.54</b> | <b>0.52</b> | <b>0.71</b> | <b>1</b>    |          |             |             |             |              |             |          |          |
|             | $n$           | 391         | 392         | 392         | 393         | 393         | 393         |          |             |             |             |              |             |          |          |
| ΣOH-PAHs    | Pearson's $r$ | <b>0.29</b> | <b>0.99</b> | <b>0.32</b> | <b>0.26</b> | <b>0.25</b> | <b>0.24</b> | <b>1</b> |             |             |             |              |             |          |          |
|             | $n$           | 391         | 391         | 391         | 391         | 391         | 391         | 391      |             |             |             |              |             |          |          |
| HCC         | Pearson's $r$ | <b>0.14</b> | 0.02        | 0.09        | 0.06        | 0.06        | 0.05        | 0.02     | <b>1</b>    |             |             |              |             |          |          |
|             | $n$           | 391         | 392         | 392         | 393         | 393         | 393         | 391      | 393         |             |             |              |             |          |          |
| Leukocytes  | Pearson's $r$ | 0.03        | 0.02        | 0.07        | <b>0.11</b> | 0.02        | -0.02       | 0.02     | 0.07        | <b>1</b>    |             |              |             |          |          |
|             | $n$           | 391         | 392         | 392         | 393         | 393         | 393         | 391      | 393         | 393         |             |              |             |          |          |
| Neutrophils | Pearson's $r$ | 0.08        | 0.07        | <b>0.11</b> | <b>0.12</b> | 0.04        | 0.02        | 0.07     | <b>0.12</b> | <b>0.90</b> | <b>1</b>    |              |             |          |          |
|             | $n$           | 391         | 392         | 392         | 393         | 393         | 393         | 391      | 393         | 393         | 393         |              |             |          |          |
| Lymphocytes | Pearson's $r$ | -0.06       | -0.04       | -0.06       | -0.02       | -0.06       | -0.08       | -0.05    | -0.08       | <b>0.45</b> | 0.09        | <b>1</b>     |             |          |          |
|             | $n$           | 391         | 392         | 392         | 393         | 393         | 393         | 391      | 393         | 393         | 393         | 393          |             |          |          |
| Monocytes   | Pearson's $r$ | 0.01        | -0.08       | -0.01       | 0.06        | 0.01        | -0.05       | -0.07    | 0.06        | <b>0.57</b> | <b>0.41</b> | <b>0.30</b>  | <b>1</b>    |          |          |
|             | $n$           | 391         | 392         | 392         | 393         | 393         | 393         | 391      | 393         | 393         | 393         | 393          | 393         |          |          |
| NLR         | Pearson's $r$ | <b>0.10</b> | 0.09        | <b>0.13</b> | <b>0.12</b> | 0.07        | 0.06        | 0.09     | <b>0.15</b> | <b>0.53</b> | <b>0.82</b> | <b>-0.49</b> | <b>0.19</b> | <b>1</b> |          |
|             | $n$           | 391         | 392         | 392         | 393         | 393         | 393         | 391      | 393         | 393         | 393         | 393          | 393         | 393      |          |
| 8-oxodG     | Pearson's $r$ | <b>0.10</b> | 0.02        | 0.03        | <b>0.17</b> | 0.09        | -0.09       | 0.02     | -0.05       | -0.02       | -0.01       | -0.04        | -0.03       | 0.02     | <b>1</b> |
|             | $n$           | 391         | 392         | 392         | 393         | 393         | 393         | 391      | 393         | 393         | 393         | 393          | 393         | 393      | 393      |

All biomarkers are ln-transformed. Significant correlations ( $p \leq 0.05$ ) are marked in bold. Urinary biomarkers are normalized for urinary specific gravity. Abbreviations: PAH polycyclic aromatic hydrocarbon, 1-OHPy 1-hydroxypyrene, 2-OHNa 2-hydroxynaphthalene, 2,3-OHFl sum of 2-hydroxyfluorene and 3-hydroxyfluorene, 2-OHPH 2-hydroxyphenanthrene, 3-OHPH 3-hydroxyphenanthrene, 1,9-OHPH sum of 1-hydroxyphenanthrene and 9-hydroxyphenanthrene, ΣOH-PAHs sum of molar concentrations of all measured OH-PAHs, HCC hair cortisol concentration, NLR neutrophil-to-lymphocyte ratio, 8-oxodG 8-oxo-7,8-dihydro-2'-deoxyguanosine.

**Table S2.** Detection frequency and limit of quantification (LOQ,  $\mu\text{g/L}$ ) for OH-PAHs in urine in the fourth Flemish Environment and Health Study (FLEHS-4).

| Biomarker      | LOQ ( $\mu\text{g/L}$ ) | % > LOQ |
|----------------|-------------------------|---------|
| <b>OH-PAHs</b> |                         |         |
| 2-OHNa         | 0.150                   | 100     |
| 2,3-OHFl       | 0.030                   | 99.5    |
| 2-OHPH         | 0.015                   | 97.6    |
| 3-OHPH         | 0.014                   | 98.8    |
| 4-OHPH         | 0.014                   | 6.9     |
| 1,9-OHPH       | 0.031                   | 98.1    |
| 1-OHPy         | 0.015                   | 97.6    |

Abbreviations: PAH polycyclic aromatic hydrocarbon, 1-OHPy 1-hydroxypyrene, 2-OHNa 2-hydroxynaphthalene, 2,3-OHFl sum of 2-hydroxyfluorene and 3-hydroxyfluorene, 2-OHPH 2-hydroxyphenanthrene, 3-OHPH 3-hydroxyphenanthrene, 1,9-OHPH sum of 1-hydroxyphenanthrene and 9-hydroxyphenanthrene, LOQ limit of quantification.

**Table S3.** Significance of associations between study population characteristics and OH-PAHs in univariate analysis.

|                                    | 2-OHNa                   | 2,3-OHFl                 | 2-OHPH                   | 3-OHPH                   | 1,9-OHPH                 | 1-OHPy                   | ΣOH-PAH                  |
|------------------------------------|--------------------------|--------------------------|--------------------------|--------------------------|--------------------------|--------------------------|--------------------------|
| <b>Sex</b>                         |                          |                          |                          |                          |                          |                          |                          |
| Male                               | reference                |
| Female                             | <b>1.32 (1.11, 1.57)</b> | 1.02 (0.91, 1.14)        | 0.90 (0.80, 1.00)        | 0.90 (0.81, 1.00)        | 1.08 (0.95, 1.22)        | 1.06 (0.94, 1.19)        | <b>1.27 (1.08, 1.49)</b> |
| <b>Age</b>                         |                          |                          |                          |                          |                          |                          |                          |
| < 14.5                             | reference                |
| 14.5–15.5                          | 1.15 (0.94, 1.40)        | <b>1.14 (1.00, 1.24)</b> | 1.13 (0.99, 1.28)        | <b>1.17 (1.04, 1.32)</b> | <b>1.28 (1.11, 1.48)</b> | <b>1.22 (1.07, 1.40)</b> | <b>1.16 (1.11, 1.48)</b> |
| > 15.5                             | 1.19 (0.84, 1.69)        | <b>1.35 (1.07, 1.69)</b> | <b>1.29 (1.03, 1.61)</b> | <b>1.26 (1.02, 1.56)</b> | 1.24 (0.96, 1.59)        | 1.22 (0.96, 1.53)        | 1.21 (0.88, 1.68)        |
| <b>Body Mass Index</b>             |                          |                          |                          |                          |                          |                          |                          |
| Underweight                        | reference                |
| Normal weight                      | 1.11 (0.81, 1.53)        | 1.06 (0.86, 1.30)        | 1.19 (0.97, 1.47)        | 1.07 (0.88, 1.30)        | 1.13 (0.90, 1.43)        | 1.05 (0.86, 1.39)        | 1.10 (0.82, 1.47)        |
| Overweight, obese                  | <b>1.58 (1.10, 2.26)</b> | <b>1.30 (1.03, 1.63)</b> | <b>1.46 (1.15, 1.84)</b> | 1.06 (0.85, 1.32)        | 1.13 (0.87, 1.48)        | 1.09 (0.86, 1.39)        | <b>1.49 (1.07, 2.08)</b> |
| <b>Perceived income adequacy</b>   |                          |                          |                          |                          |                          |                          |                          |
| Difficult                          | reference                |
| Rather easy                        | <b>0.79 (0.63, 0.98)</b> | <b>0.85 (0.74, 0.99)</b> | 0.87 (0.76, 1.01)        | 0.90 (0.78, 1.03)        | 0.93 (0.79, 1.10)        | 0.87 (0.75, 1.01)        | <b>0.79 (0.65, 0.97)</b> |
| Easy to very easy                  | <b>0.73 (0.59, 0.90)</b> | <b>0.79 (0.69, 0.90)</b> | <b>0.76 (0.66, 0.87)</b> | <b>0.84 (0.74, 0.96)</b> | 0.91 (.78, 1.06)         | <b>0.83 (0.72, 0.96)</b> | <b>0.73 (0.60, 0.89)</b> |
| <b>Area Deprivation Index</b>      |                          |                          |                          |                          |                          |                          |                          |
| 0–5.3%                             | reference                |
| 5.4–9.3%                           | 0.98 (0.76, 1.26)        | 1.18 (1.01, 1.38)        | 1.14 (0.97, 1.34)        | 1.08 (0.93, 1.26)        | 0.99 (0.83, 1.19)        | 1.14 (0.97, 1.35)        | 0.98 (0.78, 1.23)        |
| 9.4–15.5%                          | 1.21 (0.94, 1.54)        | <b>1.23 (1.05, 1.44)</b> | <b>1.17 (1.05, 1.38)</b> | 1.12 (0.96, 1.30)        | 1.03 (0.86, 1.23)        | 1.08 (0.92, 1.27)        | 1.21 (0.96, 1.52)        |
| > 15.5%                            | 1.03 (0.80, 1.31)        | 1.09 (0.93, 1.28)        | <b>1.22 (1.04, 1.43)</b> | 1.11 (0.95, 1.29)        | 0.95 (0.79, 1.14)        | 1.04 (0.89, 1.23)        | 1.03(0.82, 1.29)         |
| <b>Smoking</b>                     |                          |                          |                          |                          |                          |                          |                          |
| No                                 | reference                |
| Yes                                | <b>1.88 (1.23, 2.88)</b> | 2.49 (1.92, 3.23)        | 2.27 (0.97, 1.67)        | 1.27 (0.98, 1.64)        | 1.28 (0.94, 1.72)        | 1.24 (0.93, 1.66)        | <b>1.81 (1.21, 2.70)</b> |
| <b>Residential exposure to ETS</b> |                          |                          |                          |                          |                          |                          |                          |
| No                                 | reference                |
| Yes                                | 1.28 (0.96, 1.70)        | <b>1.36 (1.14, 1.64)</b> | <b>1.34 (1.12, 1.62)</b> | <b>1.22 (1.03, 1.45)</b> | 1.07 (0.87, 1.31)        | <b>1.09 (1.06, 1.56)</b> | 1.25 (0.96, 1.63)        |
| <b>Season</b>                      |                          |                          |                          |                          |                          |                          |                          |
| Winter                             | reference                |
| Spring                             | 0.84 (0.69, 1.03)        | 1.14 (1.02, 1.29)        | <b>1.30 (1.14, 1.47)</b> | <b>1.22 (1.08, 1.37)</b> | <b>1.16 (1.01, 1.34)</b> | <b>1.14 (1.00, 1.30)</b> | 0.86 (0.72, 1.04)        |
| Summer                             | -                        | -                        | -                        | -                        | -                        | -                        | -                        |
| Fall                               | 0.96 (0.76, 1.22)        | 1.08 (0.92, 1.26)        | 1.13 (0.97, 1.31)        | 0.98 (0.85, 1.13)        | 0.80 (0.67, 0.95)        | 0.96 (0.82, 1.12)        | 0.96 (0.77, 1.20)        |
| <b>2-day mean temperature (°C)</b> |                          |                          |                          |                          |                          |                          |                          |
| < 6                                | reference                |
| 6–12                               | 0.83 (1.68, 1.02)        | 1.02 (0.90, 1.16)        | 1.10 (0.98, 1.26)        | 1.03 (0.91, 1.17)        | 0.98 (0.84, 1.14)        | 0.95 (0.86, 1.09)        | 0.85 (0.70, 1.03)        |
| > 12                               | 0.85 (0.68, 1.05)        | <b>1.22 (1.06, 1.40)</b> | <b>1.36 (1.19, 1.56)</b> | <b>1.29 (1.14, 1.47)</b> | 1.15 (0.98, 1.35)        | 1.14 (0.98, 1.32)        | 0.86 (0.71, 1.06)        |
| <b>Recent health complaints</b>    |                          |                          |                          |                          |                          |                          |                          |
| No                                 | reference                |
| Yes                                | 1.09 (0.90, 1.32)        | 0.97 (0.86, 1.10)        | 0.98 (0.87, 1.11)        | 0.95 (0.85, 1.07)        | 0.92 (0.80, 1.06)        | 0.97 (0.86, 1.10)        | 1.08 (0.90, 1.29)        |

All biomarkers are ln-transformed. Significant correlations ( $p \leq 0.05$ ) are marked in bold. Abbreviations: OH-PAHs hydroxylated polycyclic aromatic hydrocarbon, 2-OHNa 2-hydroxy-naphthalene, 2,3-OHFl sum of 2-hydroxy-fluorene and 3-hydroxy-fluorene, 2-OHPH 2-hydroxy-phenanthrene, 3-OHPH 3-hydroxy-phenanthrene, 1,9-OHPH sum of 1-hydroxy-phenanthrene and 9-hydroxy-phenanthrene, 1-OHPy 1-hydroxy-pyrene, ΣOH-PAHs sum of molar concentrations of all measured OH-PAHs, ETS environmental tobacco smoke.

**Table S4.** Significance of associations between study population characteristics and effect biomarkers in univariate analysis.

|                                    | HCC                      | Leucocytes               | Neutrophils              | Lymphocytes              | Monocytes                | NLR                       | 8-oxodG                  |
|------------------------------------|--------------------------|--------------------------|--------------------------|--------------------------|--------------------------|---------------------------|--------------------------|
| <b>Sex</b>                         |                          |                          |                          |                          |                          |                           |                          |
| Male                               | reference                | reference                | reference                | reference                | reference                | reference                 | reference                |
| Female                             | 1.14 (0.98, 1.33)        | <b>1.08 (1.03, 1.13)</b> | <b>1.21 (1.13, 1.31)</b> | 0.96 (0.92, 1.01)        | 0.97 (0.92, 1.03)        | <b>1.26 (1.16, 1.387)</b> | 1.01 (0.93, 1.10)        |
| <b>Age</b>                         |                          |                          |                          |                          |                          |                           |                          |
| < 14.5                             | reference                | reference                | reference                | reference                | reference                | reference                 | reference                |
| 14.5–15.5                          | 1.13 (0.95, 1.35)        | 1.04 (0.99, 1.10)        | 1.09 (1.00, 1.09)        | 1.00 (0.95, 1.06)        | 1.03 (0.96, 1.10)        | 1.09 (0.98, 1.20)         | 1.02 (0.92, 1.13)        |
| > 15.5                             | <b>1.39 (1.03, 1.89)</b> | 1.10 (1.00, 1.21)        | <b>1.17 (1.01, 1.36)</b> | 1.01 (0.92, 1.12)        | 0.98 (0.87, 1.10)        | 1.15 (0.97, 1.37)         | 1.14 (0.96, 1.35)        |
| <b>Body Mass Index</b>             |                          |                          |                          |                          |                          |                           |                          |
| Underweight                        | reference                | reference                | reference                | reference                | reference                | reference                 | reference                |
| Normal weight                      | 1.08 (0.82, 1.43)        | 1.00 (0.91, 1.09)        | 0.97 (0.85, 1.12)        | 1.05 (0.96, 1.15)        | 0.98 (0.88, 1.09)        | 0.92 (0.79, 1.08)         | 1.00 (0.85, 1.17)        |
| Overweight, obese                  | 1.21 (0.88, 1.66)        | 1.06 (0.96, 1.18)        | 1.10 (0.94, 1.29)        | 1.06 (0.95, 1.17)        | 1.00 (0.87, 1.11)        | 1.05 (0.87, 1.25)         | 0.98 (0.82, 1.17)        |
| <b>Perceived Income Adequacy</b>   |                          |                          |                          |                          |                          |                           |                          |
| Difficult                          | reference                | reference                | reference                | reference                | reference                | reference                 | reference                |
| Rather easy                        | 0.88 (0.72, 1.07)        | 1.02 (0.96, 1.09)        | 1.00 (0.90, 1.10)        | 1.05 (0.98, 1.123)       | 1.03 (0.96, 1.11)        | 0.95 (0.85, 1.06)         | 0.94 (0.84, 1.05)        |
| Easy to very easy                  | 0.82 (0.68, 1.00)        | 1.01 (0.95, 1.07)        | 0.98 (0.90, 1.08)        | 1.02 (0.96, 1.09)        | 1.00 (0.93, 1.07)        | 0.96 (0.86, 1.07)         | 0.95 (0.85, 1.06)        |
| <b>Area Deprivation Index</b>      |                          |                          |                          |                          |                          |                           |                          |
| 0–5.3%                             | reference                | reference                | reference                | reference                | reference                | reference                 | reference                |
| 5.4–9.3%                           | 0.94 (0.76, 1.17)        | 1.01 (0.94, 1.058)       | 1.00 (0.90, 1.12)        | 1.00 (0.93, 1.07)        | 0.9 (0.91, 1.07)         | 1.00 (0.89, 1.14)         | 1.03 (0.91, 1.17)        |
| 9.4–15.5%                          | 1.03 (0.83, 1.28)        | 0.97 (0.91, 1.04)        | 0.98 (0.88, 1.09)        | 0.96 (0.90, 1.03)        | 0.97 (0.89, 1.05)        | 1.01 (0.90, 1.15)         | 1.02 (0.90, 1.15)        |
| > 15.5%                            | 1.02 (0.82, 1.27)        | 1.04 (0.97, 1.11)        | 1.05 (0.94, 1.17)        | 1.00 (0.93, 1.07)        | 1.03 (0.95, 1.12)        | 1.06 (0.93, 1.20)         | 1.01 (0.89, 1.14)        |
| <b>Smoking</b>                     |                          |                          |                          |                          |                          |                           |                          |
| No                                 | reference                | reference                | reference                | reference                | reference                | reference                 | reference                |
| Yes                                | 1.11 (0.77, 1.59)        | 1.03 (0.92, 1.16)        | 1.05 (0.87, 1.26)        | 1.01 (0.90, 1.14)        | 1.00 (0.87, 1.15)        | 1.03 (0.84, 1.27)         | 1.15 (0.93, 1.41)        |
| <b>Residential exposure to ETS</b> |                          |                          |                          |                          |                          |                           |                          |
| No                                 | reference                | reference                | reference                | reference                | reference                | reference                 | reference                |
| Yes                                | 0.83 (0.64, 1.07)        | <b>1.09 (1.01, 1.19)</b> | 1.10 (0.97, 1.25)        | <b>1.10 (1.01, 1.19)</b> | 1.03 (0.94, 1.14)        | 1.00 (0.86, 1.15)         | <b>1.21 (1.05, 1.39)</b> |
| <b>Season</b>                      |                          |                          |                          |                          |                          |                           |                          |
| Winter                             | reference                | reference                | reference                | reference                | reference                | reference                 | reference                |
| Spring                             | 1.10 (0.92, 1.31)        | 1.02 (0.96, 1.08)        | 1.00 (0.92, 1.09)        | 1.05 (0.99, 1.11)        | 1.01 (0.94, 1.08)        | 0.95 (0.86, 1.05)         | 0.99 (0.90, 1.410)       |
| Summer                             | -                        | -                        | -                        | -                        | -                        | -                         | -                        |
| Fall                               | 1.21 (0.99, 1.50)        | 1.02 (0.96, 1.09)        | 1.03 (0.93, 1.15)        | 0.98 (0.91, 1.04)        | 1.01 (0.93, 1.09)        | 1.06 (0.94, 1.19)         | 1.08 (0.96, 1.22)        |
| <b>2-day mean temp</b>             |                          |                          |                          |                          |                          |                           |                          |
| <6                                 | -                        | reference                | reference                | reference                | reference                | reference                 | reference                |
| 6–12                               | -                        | 1.02 (0.96, 1.08)        | 1.03 (0.94, 1.12)        | 0.99 (0.93, 1.05)        | 1.00 (0.93, 1.07)        | 1.04 (0.94, 1.15)         | 1.00 (0.91, 1.11)        |
| > 12                               | -                        | 0.98 (0.92, 1.04)        | 0.92 (0.81, 1.01)        | 1.06 (0.99, 1.12)        | 1.00 (0.93, 1.08)        | <b>0.87 (0.78, 0.97)</b>  | 0.96 (0.86, 1.07)        |
| <b>Recent health complaints</b>    |                          |                          |                          |                          |                          |                           |                          |
| No                                 | -                        | reference                | reference                | reference                | reference                | reference                 | reference                |
| Yes                                | -                        | <b>1.09 (1.04, 1.15)</b> | <b>1.14 (1.05, 1.23)</b> | 1.01 (0.93, 1.07)        | <b>1.09 (1.02, 1.16)</b> | <b>1.12 (1.02, 1.24)</b>  | 1.02 (0.93, 1.13)        |

All biomarkers are ln-transformed. Significant correlations ( $p \leq 0.05$ ) are marked in bold. 8-OHdG is adjusted for urinary specific gravity. ETS environmental tobacco smoke, HCC hair cortisol concentration, NLR neutrophil to lymphocyte ratio, 8-oxodG 8-oxo-7,8-dihydro-2'-deoxyguanosine.

**Table S5.** Significance of differences in associations between OH-PAHs and outcomes by sex.

| OH-PAHs  | HCC          | Leucocytes | <i>p</i> -value of interaction by sex |              |           |              | 8-oxodG |
|----------|--------------|------------|---------------------------------------|--------------|-----------|--------------|---------|
|          |              |            | Neutrophils                           | Lymphocytes  | Monocytes | NLR          |         |
| 2-OHNa   | <b>0.067</b> | 0.240      | 0.271                                 | 0.384        | 0.570     | 0.649        | 0.449   |
| 2,3-OHFl | <b>0.154</b> | 0.239      | 0.979                                 | <b>0.012</b> | 0.305     | <b>0.147</b> | 0.991   |
| 2-OHPH   | <b>0.079</b> | 0.706      | 0.920                                 | 0.477        | 0.310     | 0.739        | 0.697   |
| 3-OHPH   | 0.235        | 0.700      | 0.942                                 | 0.456        | 0.630     | 0.616        | 0.940   |
| 1,9-OHPH | 0.485        | 0.325      | 0.204                                 | 0.602        | 0.202     | 0.205        | 0.300   |
| 1-OHPy   | 0.642        | 0.264      | 0.544                                 | 0.407        | 0.447     | 0.963        | 0.799   |
| ΣOH-PAH  | 0.580        | 0.849      | 0.625                                 | 0.470        | 0.275     | 0.398        | 0.332   |

Significance of the interaction term of OH-PAH and sex in models, adjusted for sex, age, BMI, household socio-economic status, season of sampling, smoking and residential exposure to environmental tobacco smoke is presented. Significant interactions (*p*-interaction ≤ 0.20) are marked in bold. Abbreviations: OH-PAHs hydroxylated polycyclic aromatic hydrocarbon, 1-OHPy 1-hydroxypyrene, 2-OHNa 2-hydroxynaphthalene, 2,3-OHFl sum of 2-hydroxyfluorene and 3-hydroxyfluorene, 2-OHPH 2-hydroxyphenanthrene, 3-OHPH 3-hydroxyphenanthrene, 1,9-OHPH sum of 1-hydroxyphenanthrene and 9-hydroxyphenanthrene, ΣOH-PAHs sum of molar concentrations of all measured OH-PAHs, HCC hair cortisol concentration, NLR neutrophil-to-lymphocyte ratio, 8-oxodG 8-oxo-7,8-dihydro-2'-deoxyguanosine.

**Table S6.** Linear regression analyses of urinary OH-PAHs concentrations, estimated effect for boys in girls of associations that significantly differed by sex.

| OH-PAHs                                     | Boys              | Girls                    |
|---------------------------------------------|-------------------|--------------------------|
|                                             | β (95% CI)        | β (95% CI)               |
| <b>HCC (pg/mg)</b>                          |                   |                          |
| 2-OHNa                                      | 1.05 (0.96, 1.15) | 0.93 (0.86, 1.02)        |
| 2,3-OHFl                                    | 1.13 (0.98, 1.30) | 0.99 (0.87, 1.14)        |
| 2-OHPH                                      | 1.11 (0.96, 1.28) | 0.95 (0.84, 1.08)        |
| <b>Lymphocytes (cells/μL)</b>               |                   |                          |
| 2,3-OHFl                                    | 1.02 (0.97, 1.07) | <b>0.94 (0.90, 0.98)</b> |
| <b>neutrophil-to-lymphocyte ratio (NLR)</b> |                   |                          |
| 2,3-OHFl                                    | 1.02 (0.94, 1.10) | <b>1.10 (1.02, 1.18)</b> |

Effect estimates β are presented with their 95% confidence interval (95% CI) as the factor change in hair cortisol concentration (HCC), lymphocyte count and neutrophil-to-lymphocyte ratio (NLR) for a doubling in OH-PAH concentration. Models adjusted for sex, age, BMI, household socio-economic status, season of sampling, smoking and residential exposure to environmental tobacco smoke and including the interaction term of each OH-PAH with sex. Significant associations are marked in bold. Abbreviations: OH-PAHs hydroxylated polycyclic aromatic hydrocarbon, 1-OHPy 1-hydroxypyrene, 2-OHNa 2-hydroxynaphthalene, 2,3-OHFl sum of 2-hydroxyfluorene and 3-hydroxyfluorene, 2-OHPH 2-hydroxyphenanthrene, 3-OHPH 3-hydroxyphenanthrene, 1,9-OHPH sum of 1-hydroxyphenanthrene and 9-hydroxyphenanthrene.

**Table S7.** Sensitivity analysis, main models of associations between urinary OH-PAHs concentrations and outcomes additionally adjusted for neighborhood socio-economic status.

| OH-PAHs          | $\beta$ (95% CI)         |                          |                          |                          |                   |                          |                          |
|------------------|--------------------------|--------------------------|--------------------------|--------------------------|-------------------|--------------------------|--------------------------|
|                  | HCC                      | Leucocytes               | Neutrophils              | Lymphocytes              | Monocytes         | NLR                      | 8-oxodG                  |
| 2-OHNa           | 0.98 (0.92, 1.05)        | 1.00 (0.98, 1.02)        | 1.00 (0.97, 1.04)        | 0.99 (0.97, 1.01)        | 0.98 (0.96, 1.00) | 1.01 (0.98, 1.05)        | 1.01 (0.98, 1.05)        |
| 2,3-OHFl         | 1.06 (0.95, 1.18)        | 1.01 (0.98, 1.05)        | 1.04 (0.99, 1.09)        | 0.97 (0.94, 1.01)        | 1.00 (0.96, 1.04) | <b>1.07 (1.01, 1.13)</b> | 1.04 (0.98, 1.10)        |
| 2-OHPH           | 1.03 (0.93, 1.14)        | <b>1.03 (1.00, 1.06)</b> | <b>1.06 (1.01, 1.11)</b> | 0.98 (0.95, 1.01)        | 1.02 (0.98, 1.06) | <b>1.08 (1.02, 1.14)</b> | <b>1.08 (1.02, 1.14)</b> |
| 3-OHPH           | 1.06 (0.95, 1.17)        | 1.01 (0.97, 1.04)        | 1.02 (0.97, 1.08)        | 0.97 (0.94, 1.00)        | 1.00 (0.96, 1.05) | 1.06 (1.00, 1.12)        | <b>1.06 (1.00, 1.12)</b> |
| 1,9-OHPH         | 1.02 (0.94, 1.12)        | 0.99 (0.96, 1.02)        | 1.00 (0.96, 1.04)        | <b>0.97 (0.94, 1.00)</b> | 0.99 (0.95, 1.02) | 1.03 (0.98, 1.03)        | 1.01 (0.96, 1.06)        |
| 1-OHPy           | <b>1.13 (1.03, 1.25)</b> | 1.00 (0.97, 1.03)        | 1.02 (0.97, 1.07)        | 0.98 (0.95, 1.01)        | 1.00 (0.97, 1.04) | 1.05 (0.99, 1.10)        | <b>1.07 (1.02, 1.13)</b> |
| $\Sigma$ OH-PAHs | 0.98 (0.91, 1.05)        | 1.00 (0.98, 1.02)        | 1.01 (0.98, 1.04)        | 0.99 (0.97, 1.01)        | 0.98 (0.96, 1.01) | 1.02 (0.98, 1.06)        | 1.02 (0.98, 1.06)        |

Effect estimates  $\beta$  are presented with their 95% confidence interval (95% CI) as the factor change in HCC, leucocyte count or NLR for a doubling in OH-PAH concentration. Models are adjusted for sex, age, BMI, household socio-economic status, neighborhood socio-economic status, season, smoking and residential exposure to environmental tobacco smoke. Significant associations ( $p$ -value  $\leq 0.05$ ) are marked in bold. Abbreviations: OH-PAHs hydroxylated polycyclic aromatic hydrocarbon, 1-OHPy 1-hydroxypyrene, 2-OHNa 2-hydroxynaphthalene, 2,3-OHFl sum of 2-hydroxyfluorene and 3-hydroxyfluorene, 2-OHPH 2-hydroxyphenanthrene, 3-OHPH 3-hydroxyphenanthrene, 1,9-OHPH sum of 1-hydroxyphenanthrene and 9-hydroxyphenanthrene,  $\Sigma$ OH-PAHs sum of molar concentrations of all measured OH-PAHs, HCC hair cortisol concentration, 8-oxodG 8-oxo-7,8-dihydro-2'-deoxyguanosine, NLR neutrophil-to-lymphocyte ratio.

**Table S8.** Sensitivity analysis, main models of associations between urinary OH-PAHs concentrations and 8-OHdG, leucocyte counts and NLR additionally adjusted for 2-day mean ambient temperature.

| OH-PAHs          | $\beta$ (95% CI)         |                          |                          |                   |                          |                          |
|------------------|--------------------------|--------------------------|--------------------------|-------------------|--------------------------|--------------------------|
|                  | Leucocytes               | Neutrophils              | Lymphocytes              | Monocytes         | NLR                      | 8-oxodG                  |
| 2-OHNa           | 1.00 (0.98, 1.02)        | 1.01 (0.97, 1.04)        | 0.99 (0.97, 1.01)        | 0.98 (0.96, 1.00) | 1.01 (0.98, 1.05)        | 1.01 (0.98, 1.05)        |
| 2,3-OHFl         | 1.01 (0.98, 1.05)        | 1.04 (0.99, 1.09)        | 0.97 (0.94, 1.00)        | 1.00 (0.96, 1.04) | <b>1.07 (1.01, 1.14)</b> | 1.05 (0.99, 1.11)        |
| 2-OHPH           | <b>1.03 (1.00, 1.07)</b> | <b>1.07 (1.01, 1.12)</b> | 0.98 (0.95, 1.01)        | 1.02 (0.98, 1.06) | <b>1.09 (1.03, 1.15)</b> | <b>1.08 (1.02, 1.14)</b> |
| 3-OHPH           | 1.01 (0.97, 1.04)        | 1.03 (0.98, 1.08)        | <b>0.97 (0.93, 1.00)</b> | 1.00 (0.96, 1.04) | <b>1.06 (1.00, 1.13)</b> | <b>1.06 (1.00, 1.12)</b> |
| 1,9-OHPH         | 0.99 (0.96, 1.01)        | 0.99 (0.95, 1.04)        | 0.97 (0.94, 1.00)        | 0.98 (0.95, 1.02) | 1.02 (0.97, 1.07)        | 1.01 (0.96, 1.06)        |
| 1-OHPy           | 1.00 (0.97, 1.03)        | 1.02 (0.97, 1.07)        | 0.97 (0.94, 1.00)        | 1.00 (0.97, 1.04) | 1.05 (0.99, 1.11)        | <b>1.07 (1.02, 1.13)</b> |
| $\Sigma$ OH-PAHs | 1.00 (0.98, 1.02)        | 1.01 (0.98, 1.04)        | 0.99 (0.97, 1.01)        | 0.98 (0.96, 1.01) | 1.02 (0.98, 1.06)        | 1.02 (0.98, 1.06)        |

Effect estimates  $\beta$  are presented with their 95% confidence interval (95% CI) as the factor change in leucocyte count or NLR for a doubling in OH-PAH concentration. Models are adjusted for sex, age, BMI, household socio-economic status, season of sampling, smoking and residential exposure to environmental tobacco smoke, 2-day mean ambient temperature. Models for 8-OHdG are additionally adjusted for urinary density. Significant associations ( $p$ -value  $\leq 0.05$ ) are marked in bold. Abbreviations: OH-PAHs hydroxylated polycyclic aromatic hydrocarbon, 1-OHPy 1-hydroxypyrene, 2-OHNa 2-hydroxynaphthalene, 2,3-OHFl sum of 2-hydroxyfluorene and 3-hydroxyfluorene, 2-OHPH 2-hydroxyphenanthrene, 3-OHPH 3-hydroxyphenanthrene, 1,9-OHPH sum of 1-hydroxyphenanthrene and 9-hydroxyphenanthrene,  $\Sigma$ OH-PAHs sum of molar concentrations of all measured OH-PAHs, 8-oxodG 8-oxo-7,8-dihydro-2'-deoxyguanosine, NLR neutrophil-to-lymphocyte ratio.

**Table S9.** Sensitivity analysis, main models of associations between urinary OH-PAHs and leucocyte counts and NLR additionally adjusted for recent health complaints.

| OH-PAHs          | $\beta$ (95% CI)         |                          |                          |                   |                          |
|------------------|--------------------------|--------------------------|--------------------------|-------------------|--------------------------|
|                  | Leucocytes               | Neutrophils              | Lymphocytes              | Monocytes         | NLR                      |
| 2-OHNa           | 1.00 (0.98, 1.02)        | 1.00 (0.97, 1.04)        | 0.99 (0.97, 1.01)        | 0.98 (0.96, 1.00) | 1.01 (0.98, 1.05)        |
| 2,3-OHFl         | 1.01 (0.98, 1.04)        | 1.03 (0.98, 1.09)        | 0.97 (0.94, 1.00)        | 1.00 (0.96, 1.04) | <b>1.07 (1.01, 1.13)</b> |
| 2-OHPH           | <b>1.03 (1.00, 1.06)</b> | <b>1.06 (1.01, 1.11)</b> | 0.98 (0.95, 1.01)        | 1.02 (0.98, 1.06) | <b>1.08 (1.02, 1.14)</b> |
| 3-OHPH           | 1.00 (0.97, 1.04)        | 1.02 (0.97, 1.07)        | <b>0.97 (0.94, 1.00)</b> | 1.00 (0.96, 1.04) | <b>1.06 (1.00, 1.12)</b> |
| 1,9-OHPH         | 0.99 (0.96, 1.02)        | 1.00 (0.95, 1.04)        | <b>0.97 (0.94, 1.00)</b> | 0.99 (0.95, 1.02) | 1.03 (0.98, 1.08)        |
| 1-OHPy           | 1.00 (0.97, 1.03)        | 1.02 (0.97, 1.07)        | 0.97 (0.94, 1.01)        | 1.00 (0.97, 1.04) | 1.04 (0.99, 1.10)        |
| $\Sigma$ OH-PAHs | 1.00 (0.98, 1.02)        | 1.01 (0.97, 1.04)        | 0.99 (0.97, 1.01)        | 0.98 (0.96, 1.01) | 1.02 (0.98, 1.06)        |

Effect estimates  $\beta$  are presented with their 95% confidence interval (95% CI) as the factor change in leucocyte count or NLR for a doubling in OH-PAH concentration. Models are adjusted for sex, age, BMI, household socio-economic status, season of sampling, smoking and residential exposure to environmental tobacco smoke, recent health complaints. Significant associations ( $p$ -value  $\leq 0.05$ ) are marked in bold. Abbreviations: OH-PAHs hydroxylated polycyclic aromatic hydrocarbon, 1-OHPy 1-hydroxypyrene, 2-OHNa 2-hydroxynaphthalene, 2,3-OHFl sum of 2-hydroxyfluorene and 3-hydroxyfluorene, 2-OHPH 2-hydroxyphenanthrene, 3-OHPH 3-hydroxyphenanthrene, 1,9-OHPH sum of 1-hydroxyphenanthrene and 9-hydroxyphenanthrene,  $\Sigma$ OH-PAHs sum of molar concentrations of all measured OH-PAHs, NLR neutrophil-to-lymphocyte ratio.

**Table S10.** Associations between HCC, 8-OHdG, leucocyte counts and NLR and between urinary OH-PAHs concentration and aforementioned outcomes in models adjusted for HCC.

|                  | $\beta$ (95% CI)         |                          |                          |                   |                          |                          |
|------------------|--------------------------|--------------------------|--------------------------|-------------------|--------------------------|--------------------------|
|                  | Leucocytes               | Neutrophils              | Lymphocytes              | Monocytes         | NLR                      | 8-oxodG                  |
| HCC              | 1.01 (0.99, 1.03)        | 1.03 (0.99, 1.07)        | 0.98 (0.96, 1.01)        | 1.02 (0.99, 1.05) | <b>1.05 (1.01, 1.09)</b> | 0.98 (0.94, 1.02)        |
| 2-OHNa           | 1.00 (0.98, 1.02)        | 1.01 (0.97, 1.04)        | 0.99 (0.97, 1.01)        | 0.98 (0.96, 1.01) | 1.01 (0.98, 1.05)        | 1.01 (0.98, 1.05)        |
| HCC              | 1.01 (0.99, 1.03)        | 1.03 (0.99, 1.07)        | 0.98 (0.96, 1.01)        | 1.02 (0.96, 1.04) | <b>1.05 (1.01, 1.09)</b> | 0.98 (0.94, 1.02)        |
| 2,3-OHFl         | 1.01 (0.98, 1.04)        | 1.03 (0.98, 1.08)        | 0.97 (0.94, 1.00)        | 1.00 (0.96, 1.04) | <b>1.06 (1.00, 1.12)</b> | 1.05 (0.99, 1.11)        |
| HCC              | 1.01 (0.99, 1.03)        | 1.03 (0.99, 1.07)        | 0.99 (0.96, 1.01)        | 1.02 (0.96, 1.04) | <b>1.04 (1.00, 1.09)</b> | 0.98 (0.94, 1.01)        |
| 2-OHPH           | <b>1.03 (1.00, 1.06)</b> | <b>1.06 (1.01, 1.11)</b> | 0.98 (0.95, 1.01)        | 1.02 (0.98, 1.06) | <b>1.08 (1.02, 1.14)</b> | <b>1.08 (1.02, 1.14)</b> |
| HCC              | 1.01 (0.99, 1.03)        | 1.03 (0.99, 1.07)        | 0.99 (0.96, 1.01)        | 1.02 (0.96, 1.04) | <b>1.05 (1.01, 1.09)</b> | 0.98 (0.94, 1.01)        |
| 3-OHPH           | 1.00 (0.97, 1.04)        | 1.02 (0.97, 1.07)        | <b>0.97 (0.94, 1.00)</b> | 1.00 (0.96, 1.04) | 1.05 (0.99, 1.11)        | <b>1.06 (1.00, 1.12)</b> |
| HCC              | 1.01 (0.99, 1.03)        | 1.03 (0.99, 1.07)        | 0.99 (0.96, 1.01)        | 1.02 (0.96, 1.04) | <b>1.04 (1.00, 1.09)</b> | 0.98 (0.94, 1.01)        |
| 1,9-OHPH         | 0.99 (0.96, 1.01)        | 0.99 (0.95, 1.04)        | <b>0.97 (0.94, 1.00)</b> | 0.98 (0.95, 1.02) | 1.02 (0.97, 1.07)        | 1.01 (0.96, 1.06)        |
| HCC              | 1.01 (0.99, 1.03)        | 1.03 (0.99, 1.07)        | 0.99 (0.96, 1.01)        | 1.02 (0.96, 1.04) | <b>1.05 (1.01, 1.09)</b> | 0.98 (0.94, 1.02)        |
| 1-OHPy           | 1.00 (0.97, 1.03)        | 1.01 (0.96, 1.01)        | 0.98 (0.95, 1.01)        | 1.00 (0.96, 1.04) | 1.04 (0.98, 1.09)        | <b>1.08 (1.02, 1.13)</b> |
| HCC              | 1.01 (0.99, 1.03)        | 1.03 (0.99, 1.07)        | 0.99 (0.96, 1.01)        | 1.02 (0.96, 1.04) | <b>1.04 (1.00, 1.09)</b> | 0.97 (0.93, 1.01)        |
| $\Sigma$ OH-PAHs | 1.00 (0.98, 1.02)        | 1.01 (0.98, 1.05)        | 0.99 (0.97, 1.01)        | 0.98 (0.96, 1.01) | 1.02 (0.98, 1.06)        | 1.02 (0.98, 1.06)        |
| HCC              | 1.01 (0.99, 1.03)        | 1.03 (0.99, 1.07)        | 0.98 (0.96, 1.01)        | 1.02 (0.96, 1.04) | <b>1.05 (1.01, 1.09)</b> | 0.98 (0.94, 1.02)        |

Effect estimates  $\beta$  are presented with their 95% confidence interval (95% CI) as the factor change in leucocyte count or NLR for a doubling in OH-PAH concentration. Models are adjusted for sex, age, BMI, household socio-economic status, season of sampling, smoking and residential exposure to environmental tobacco smoke. Significant associations ( $p$ -value  $\leq 0.05$ ) are marked in bold. Abbreviations: PAH polycyclic aromatic hydrocarbon, 1-OHPy 1-hydroxypyrene, 2-OHNa 2-hydroxynaphthalene, 2,3-OHFl sum of 2-hydroxyfluorene and 3-hydroxyfluorene, 2-OHPH 2-hydroxyphenanthrene, 3-OHPH 3-hydroxyphenanthrene, 1,9-OHPH sum of 1-hydroxyphenanthrene and 9-hydroxyphenanthrene,  $\Sigma$ OH-PAHs sum of molar concentrations of all measured OH-PAHs, 8-oxodG 8-oxo-7,8-dihydro-2'-deoxyguanosine, NLR neutrophil-to-lymphocyte ratio, HCC hair cortisol concentration.
